# Supplementary material for: Therapeutic management of neuro-oncologic patients - potential relevance of CSF liquid biopsy
Source: PubMed Central journal article supplement (PMC6929982; doi:10.7150/thno.36884), 2020-01-01
Supplement: thnov10p0856s1.pdf [file thnov10p0856s1.pdf]

**Supplement:**

**Supplementary Table 1. OncoPrint Focus Assay (OFA) NGS Panel**

| Hotspot genes |        | Copy Number Variants | Fusion drivers |
|---------------|--------|----------------------|----------------|
| <b>DNA</b>    |        |                      | <b>RNA</b>     |
| AKT1          | IDH1   | ALK                  | ALB1           |
| ALK           | IDH2   | AR                   | ALK            |
| AR            | JAK1   | BRAF                 | AKT3           |
| BRAF          | JAK2   | CCND1                | AXL            |
| CDK4          | JAK3   | CDK4                 | BRAF           |
| CTNNB1        | KIT    | CDK6                 | EGFR           |
| DDR2          | KRAS   | EGFR                 | ERB2           |
| EGFR          | MAP2K1 | ERB2                 | ERG            |
| ERB2          | MAP2K2 | FGFR1                | ETV1           |
| ERB3          | MET    | FGFR                 | ETV4           |
| ERB4          | MTOR   | FGFR3                | ETV5           |
| ESR1          | NRAS   | FGFR4                | FGFR1          |
| FGFR2         | PDGFRA | KIT                  | GFGR2          |
| FGFR3         | PIK3CA | KRAS                 | FGFR3          |
| GNA11         | RAF1   | MET                  | MET            |
| GNAQ          | RET    | MYC                  | NTRK1          |
| HRAS          | ROS1   | MYCN                 | NTRK2          |
|               | SMO    | PDGFRA               | NTRK3          |
|               |        | PIK3CA               | PDGFRA         |
|               |        |                      | PPARG          |
|               |        |                      | RAF1           |
|               |        |                      | RET            |
|               |        |                      | ROS1           |

**Supplementary Table 2: Archer FusionPlex Sarcoma Panel (RNA)**

| <b>Fusion drivers, splicing or exon skipping variants</b> |       |
|-----------------------------------------------------------|-------|
| ALK                                                       | NCOA2 |
| CAMTA1                                                    | NTRK3 |
| CCNB3                                                     | PDGFB |
| CIC                                                       | PLAG1 |
| EPC1                                                      | ROS1  |
| EWSR1                                                     | SS18  |
| FOXO1                                                     | STAT6 |
| FUS                                                       | TAF15 |
| GLI1                                                      | TCF12 |
| HMGA2                                                     | TFE3  |
| JAZF1                                                     | TFG   |
| MEAF6                                                     | USP6  |
| MKL2                                                      | YWHAE |

**Supplementary Table 3: Addendum to Table 4 tumor genetic Mutations without or with unknown significance**

| # | Gene   | Base change | Exon  | Reference mRNA | Amino acid change | Allele frequency (%) |
|---|--------|-------------|-------|----------------|-------------------|----------------------|
| 5 | MTOR   | c.4418A>G   | 30    | NM_004958.3    | p.Asp1473Gly      | 8.57                 |
|   | PIK3CA | c.281T>C    | 2     | NM_006218.2    | p.Leu94Pro        | 7.41                 |
|   | PIK3CA | c.1022C>T   | 5     | NM_006218.2    | p.Ala341Val       | 14.11                |
|   | BRAF   | c.1522A>G   | 13    | NM_004333.4    | p.Thr508Ala       | 16.73                |
|   | FGFR2  | c.1924A>G   | 14    | NM_000141.4    | p.Ile642Val       | 33.6                 |
|   | KRAS   | c.430A>G    | 4     | NM_033360.3    | p.Thr144Ala       | 23.45                |
|   | ERBB2  | c.2006T>C   | 17    | NM_004448.3    | p.Val669Ala       | 6.8                  |
|   | JAK3   | c.1597A>G   | 12    | NM_000215.3    | p.Thr533Ala       | 7.4                  |
| 9 | MTOR   | c.7273C>T   | 53    | NM_004958.3    | p.Pro2425Ser      | 11.85                |
|   | JAK1   | c.1921A>G   | 14(I) | NM_002227.2    | p.Met641Val       | 16.05                |
|   | ALK    | c.4394T>C   | 29(I) | NM_004304.4    | p.Val1465Ala      | 13.11                |
|   | ALK    | c.3608A>G   | 23(I) | NM_004304.4    | p.Asp1203Gly      | 16.3                 |

|  |        |           |       |                |              |       |
|--|--------|-----------|-------|----------------|--------------|-------|
|  | ALK    | c.3581T>C | 23(l) | NM_004304.4    | p.Ile1194Thr | 5.3   |
|  | ALK    | c.3526C>T | 23(l) | NM_004304.4    | p.His1176Tyr | 8.35  |
|  | ALK    | c.3464T>G | 22(l) | NM_004304.4    | p.Val1155Gly | 36.65 |
|  | ALK    | c.3395A>G | 21(l) | NM_004304.4    | p.Glu1132Gly | 28.36 |
|  | ERBB4  | c.2099C>T | 18(l) | NM_005235.2    | p.Pro700Leu  | 5.9   |
|  | PIK3CA | c.1265T>C | 8(l)  | NM_006218.2    | p.Leu422Ser  | 12.35 |
|  | PIK3CA | c.2078G>A | 14(l) | NM_006218.2    | p.Arg693His  | 10.1  |
|  | PDGFRA | c.1965G>T | 14(l) | NM_006206.4    | p.Leu655Phe  | 9.01  |
|  | PDGFRA | c.2488A>G | 18(l) | NM_006206.4    | p.Lys830Glu  | 17.15 |
|  | KIT    | c.1619T>C | 10(l) | NM_000222.2    | p.Val540Ala  | 8.3   |
|  | KIT    | c.1709A>G | 11(l) | NM_000222.2    | p.Tyr570Cys  | 12.86 |
|  | APC    | c.4223A>G | 16(l) | NM_000038.5    | p.Glu1408Gly | 6.55  |
|  | EGFR   | c.358G>A  | 3(l)  | NM_005228.3    | p.Ala120Thr  | 8.8   |
|  | EGFR   | c.2170G>A | 18    | NM_005228.3    | p.Gly724Ser  | 9.9   |
|  | SMO    | c.1402A>G | 8(l)  | NM_005631.4    | p.Ser468Gly  | 32.75 |
|  | BRAF   | c.1692G>A | 13(l) | NM_004333.4    | p.Met564Ile  | 11.35 |
|  | BRAF   | c.1519A>C | 13(l) | NM_004333.4    | p.Lys507Gln  | 8.9   |
|  | FGFR1  | c.695A>C  | 6(l)  | NM_001174067.1 | p.His232Pro  | 17.16 |
|  | FGFR1  | c.637G>A  | 6(l)  | NM_001174067.1 | p.Gly213Arg  | 17.81 |
|  | MYC    | c.212T>C  | 2(l)  | NM_002467.4    | p.Leu71Pro   | 7.15  |
|  | MYC    | c.251T>C  | 2(l)  | NM_002467.4    | p.Leu84Pro   | 7.41  |
|  | MYC    | c.1151A>G | 3(l)  | NM_002467.4    | p.Glu384Gly  | 13.25 |
|  | RET    | c.1838C>T | 10(l) | NM_020975.4    | p.Pro613Leu  | 26.5  |
|  | FGFR2  | c.1022C>T | 8(l)  | NM_000141.4    | p.Thr341Met  | 9.3   |
|  | FGFR2  | c.1007A>G | 8(l)  | NM_000141.4    | p.Asp336Gly  | 8.56  |
|  | CCND1  | c.367A>G  | 2(l)  | NM_053056.2    | p.Lys123Glu  | 26.21 |
|  | KRAS   | c.395A>G  | 4(l)  | NM_033360.3    | p.Asp132Gly  | 5.8   |
|  | CDK4   | c.119C>T  | 2(l)  | NM_000075.3    | p.Pro40Leu   | 9.75  |
|  | AKT1   | c.85C>T   | 3(l)  | NM_001014431.1 | p.Leu29Phe   | 18.05 |
|  | AKT1   | c.59A>G   | 3(l)  | NM_001014431.1 | p.Lys20Arg   | 4.9   |
|  | ERBB2  | c.2291A>G | 19(l) | NM_004448.3    | p.Asn764Ser  | 13.7  |

|           |        |           |       |                             |              |       |
|-----------|--------|-----------|-------|-----------------------------|--------------|-------|
|           | ERBB2  | c.2308G>A | 20(l) | NM_004448.3                 | p.Glu770Lys  | 7.35  |
|           | ERBB2  | c.2345T>C | 20(l) | NM_004448.3                 | p.Val782Ala  | 6.6   |
|           | GNA11  | c.523A>G  | 4(l)  | NM_002067.4                 | p.Thr175Ala  | 6.35  |
| <b>16</b> | PIK3CA | c.994A>G  | 5     | NM_006218.2                 | p.Ser332Gly  | 12.06 |
|           | ROS1   | c.6059A>G | 38    | NM_002944.2                 | p.Glu2020Gly | 17.05 |
|           | EGFR   | c.320T>G  | 3     | NM_005228.3                 | p.Ile107Ser  | 7.31  |
|           | MET    | c.1109T>C | 2     | NM_001127500.1              | p.Val370Ala  | 8.25  |
|           | MET    | c.3319T>C | 16    | NM_001127500.1              | p.Phe1107Leu | 5.27  |
|           | MYC    | c.1114C>T | 3     | NM_002467.4                 | p.Arg372Ter  | 7.1   |
|           | FGFR2  | c.944C>T  | 8(l)  | NM_000141.4                 | p.Ala315Val  | 10.21 |
|           | ERBB3  | c.1099G>T | 9     | NM_001982.3                 | p.Gly367Cys  | 7.56  |
|           | CDK4   | c.904C>T  | 8     | NM_005981.3,<br>NM_000075.3 | p.Pro302Ser  | 32.35 |
|           | AKT1   | c.79T>C   | 3(l)  | NM_001014431.1              | p.Phe27Leu   | 7.21  |
|           | ERBB2  | c.2593G>T | 21    | NM_004448.3                 | p.Gly865Trp  | 7.05  |
| <b>17</b> | ALK    | c.3646A>G | 24    | NM_004304.4                 | p.Ser1216Gly | 5.7   |
|           | RAF1   | c.1228G>A | 12    | NM_002880.3                 | p.Gly410Arg  | 16.8  |
|           | PIK3CA | c.326A>G  | 2     | NM_006218.2                 | p.Glu109Gly  | 5.76  |
|           | KIT    | c.1591A>G | 10    | NM_000222.2                 | p.Ile531Val  | 10.85 |
|           | FGFR4  | c.547C>T  | 5     | NM_213647.1                 | p.Arg183Cys  | 14.75 |
|           | MET    | c.2539A>G | 11    | NM_001127500.1              | p.Lys847Glu  | 10.67 |
|           | RET    | c.2288A>G | 13    | NM_020975.4                 | p.Asn763Ser  | 5.3   |
|           | FGFR2  | c.1108A>G | 9(l)  | NM_000141.4                 | p.Thr370Ala  | 11.15 |
|           | ERBB3  | c.331T>C  | 3     | NM_001982.3                 | p.Tyr111His  | 6.4   |
|           | CDK4   | c.599T>C  | 5     | NM_000075.3                 | p.Val200Ala  | 8.8   |
|           | MAP2K1 | c.385T>C  | 3     | NM_002755.3                 | p.Phe129Leu  | 13.4  |

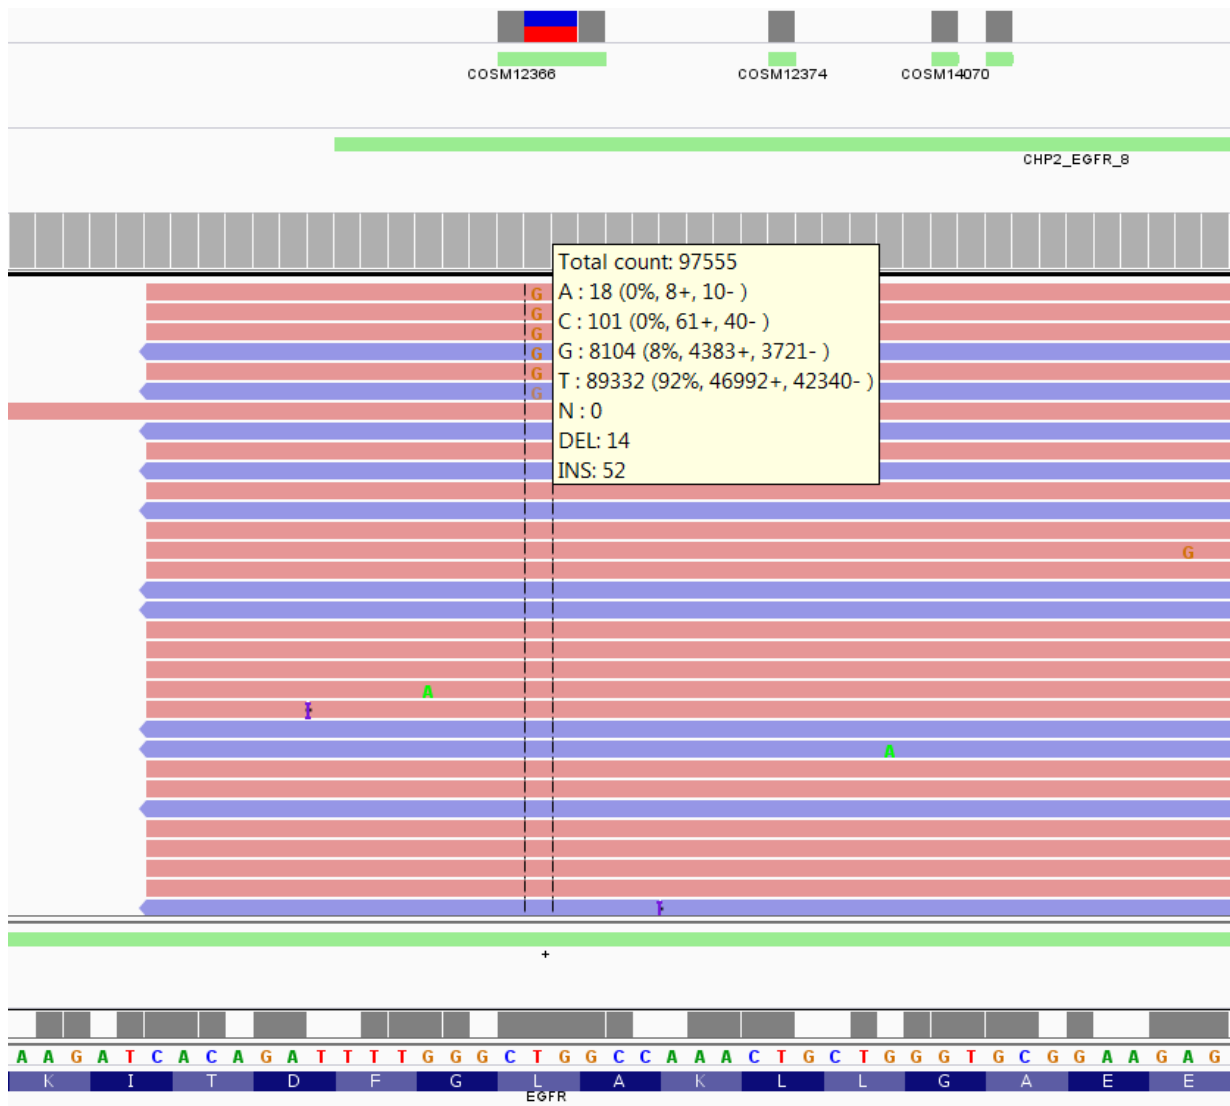

**Supplementary Figure 1: Detection of the EGFR L858R mutation in the Integrative Genomics Viewer<sup>1</sup>.**

The Integrative Genomics Viewer image displays the detection of the EGFR mutation chr7:55259514, c.2573T>G, p.Leu858Arg (L858R) from a liquor biopsy of patient #1 by NGS. The analysis was performed on an Ion Torrent Personal Genome Machine (PGM) with a high average base coverage depth (18674) to achieve an increased sensitivity to detect also low frequency mutations present in liquid biopsies. Sequencing reads were sorted by base. Shown are the total counts as well as counts for each base including the allele frequency and the forward (+, red bars) and reverse (-, blue bars) reads to check for strand read imbalances.

Reference list supplement:

1. Thorvaldsdottir, H., Robinson, J.T., and Mesirov, J.P. Integrative Genomics Viewer (IGV): high-performance genomics data visualization and exploration. *Brief Bioinform.* 2013; 14: 178–192
